# Supplementary material for: Influence of cellulose nanocrystal surface chemistry and dispersion quality on latex nanocomposite stability, film formation and adhesive properties
Source: Royal Society of Chemistry journal article supplement (doi:10.1039/d3lp00244f), 2024-01-01
Supplement: d3lp00244f1.pdf [file d3lp00244f1.pdf]

# Influence of Cellulose Nanocrystal Surface Chemistry and Dispersion Quality on Latex Nanocomposite Stability, Film Formation and Adhesive Properties

*Julia M. Antoniw,<sup>1</sup> Vida A. Gabriel,<sup>2</sup> Michael V. Kiriakou,<sup>3</sup>  
Marc A. Dubé,<sup>2</sup> Michael F. Cunningham,<sup>4</sup> Emily D. Cranston<sup>1,5,6</sup>*

<sup>1</sup>Department of Chemical and Biological Engineering, University of British Columbia, Vancouver, British Columbia V6T 1Z4, Canada

<sup>2</sup>Department of Chemical and Biological Engineering, University of Ottawa, Ottawa K1N 6N5, Ontario, Canada

<sup>3</sup>Anomera Inc., Montreal, Quebec H3B 1A7, Canada

<sup>4</sup>Department of Chemical Engineering, Queen's University, Kingston K7L 2N9, Ontario, Canada

<sup>5</sup>Department of Wood Science, University of British Columbia, Vancouver, British Columbia V6T 1Z3, Canada

<sup>6</sup>UBC Bioproducts Institute, 2385 East Mall, Vancouver, British Columbia V6T 1Z4, Canada

**Table S1.** Summary of number of repeats (n) performed per sample per test for tack, peel strength and shear strength testing for BA/MMA cast latex films.

|                   | tack | peel strength | shear strength |
|-------------------|------|---------------|----------------|
| 50 wt.% control   | 4    | 4             | 3              |
| never-dried cCNCs | 6    | 6             | 5              |
| dried cCNCs       | 6    | 6             | 5              |
| never-dried sCNCs | 5    | 6             | 4              |
| dried sCNCs       | 6    | 6             | 6              |

**Table S2.** An example of the reproducibility of the BA/MMA latex synthesis with and without CNCs; column 1 and 3 are the “control” measurements performed on a “combined” latex that is a mixture of three individual synthetic runs, whereas, column 2 and 4 are the average of three individual runs. Standard deviation is for n = 3 repeats of the test for the “combined” latexes and n = 3 repeats of the latex synthesis for the average of three latexes.

|                             | 40 wt.% control<br>“combined”<br>latex | 40 wt.% control<br>average of three<br>latexes | never-dried<br>cCNC<br>“combined”<br>latex | never-dried<br>cCNC<br>average of three<br>latexes |
|-----------------------------|----------------------------------------|------------------------------------------------|--------------------------------------------|----------------------------------------------------|
| Conversion (%)              | 98 ± 0.1                               | 98 ± 1                                         | 93 ± 0.1                                   | 94 ± 6                                             |
| solids content<br>(%)       | 39 ± 0.1                               | 39 ± 1                                         | 37 ± 0.1                                   | 38 ± 2                                             |
| latex particle<br>size (nm) | 192 ± 2                                | 188 ± 5                                        | 185 ± 1                                    | 184 ± 11                                           |
| latex PDI                   | 0.02 ± 0.01                            | 0.03 ± 0.007                                   | 0.2 ± 0.04                                 | 0.1 ± 0.06                                         |
| zeta potential<br>(mV)      | -24 ± 1                                | -21 ± 1                                        | -35 ± 1                                    | -33 ± 2                                            |
| pH                          | 3.4                                    | 3.7 ± 0.1                                      | 3.8                                        | 4.5 ± 0.9                                          |

**Table S3.** The p-value from an independent Student’s t-test on the latex PSA results. The t-test estimates if the difference in the reported tack, peel and shear values are statistically significant. The null hypothesis is that there is no difference in variance between the reported measurement of tack, peel and shear between the two populations listed in the left column. If  $p > 0.05$  fail to reject the null hypothesis and if  $p < 0.05$  reject the null hypothesis.

| Compared Latexes                      | p-values |               |                |
|---------------------------------------|----------|---------------|----------------|
|                                       | tack     | peel strength | shear strength |
| never-dried CNC,<br>dried cCNC        | 0.008    | 0.467         | 0.001          |
| never-dried sCNC,<br>dried sCNC       | < 0.001  | < 0.001       | 0.269          |
| never-dried cCNC,<br>sCNC never dried | < 0.001  | 0.098         | 0.390          |
| never-dried cCNC,<br>dried sCNC       | 0.508    | 0.015         | 0.718          |
| dried cCNC, never-<br>dried sCNC      | < 0.001  | 0.114         | 0.003          |
| dried cCNC, dried<br>sCNC             | 0.016    | 0.001         | 0.001          |
| never-dried cCNCs,<br>50 wt.% control | < 0.001  | 0.001         | 0.106          |
| dried cCNC, 50 wt.%<br>control        | < 0.001  | < 0.001       | 0.005          |
| never-dried sCNC, 50<br>wt.% Control  | 0.634    | 0.001         | 0.063          |
| dried sCNC, 50 wt.%<br>control        | 0.001    | < 0.001       | 0.192          |
